# Supplementary material
Source: PubMed Central journal article supplement (PMC4577376)
Supplement: supp_pp.15.00253_00253revisedsuppfigs.pdf [file supp_pp.15.00253_00253revisedsuppfigs.pdf]

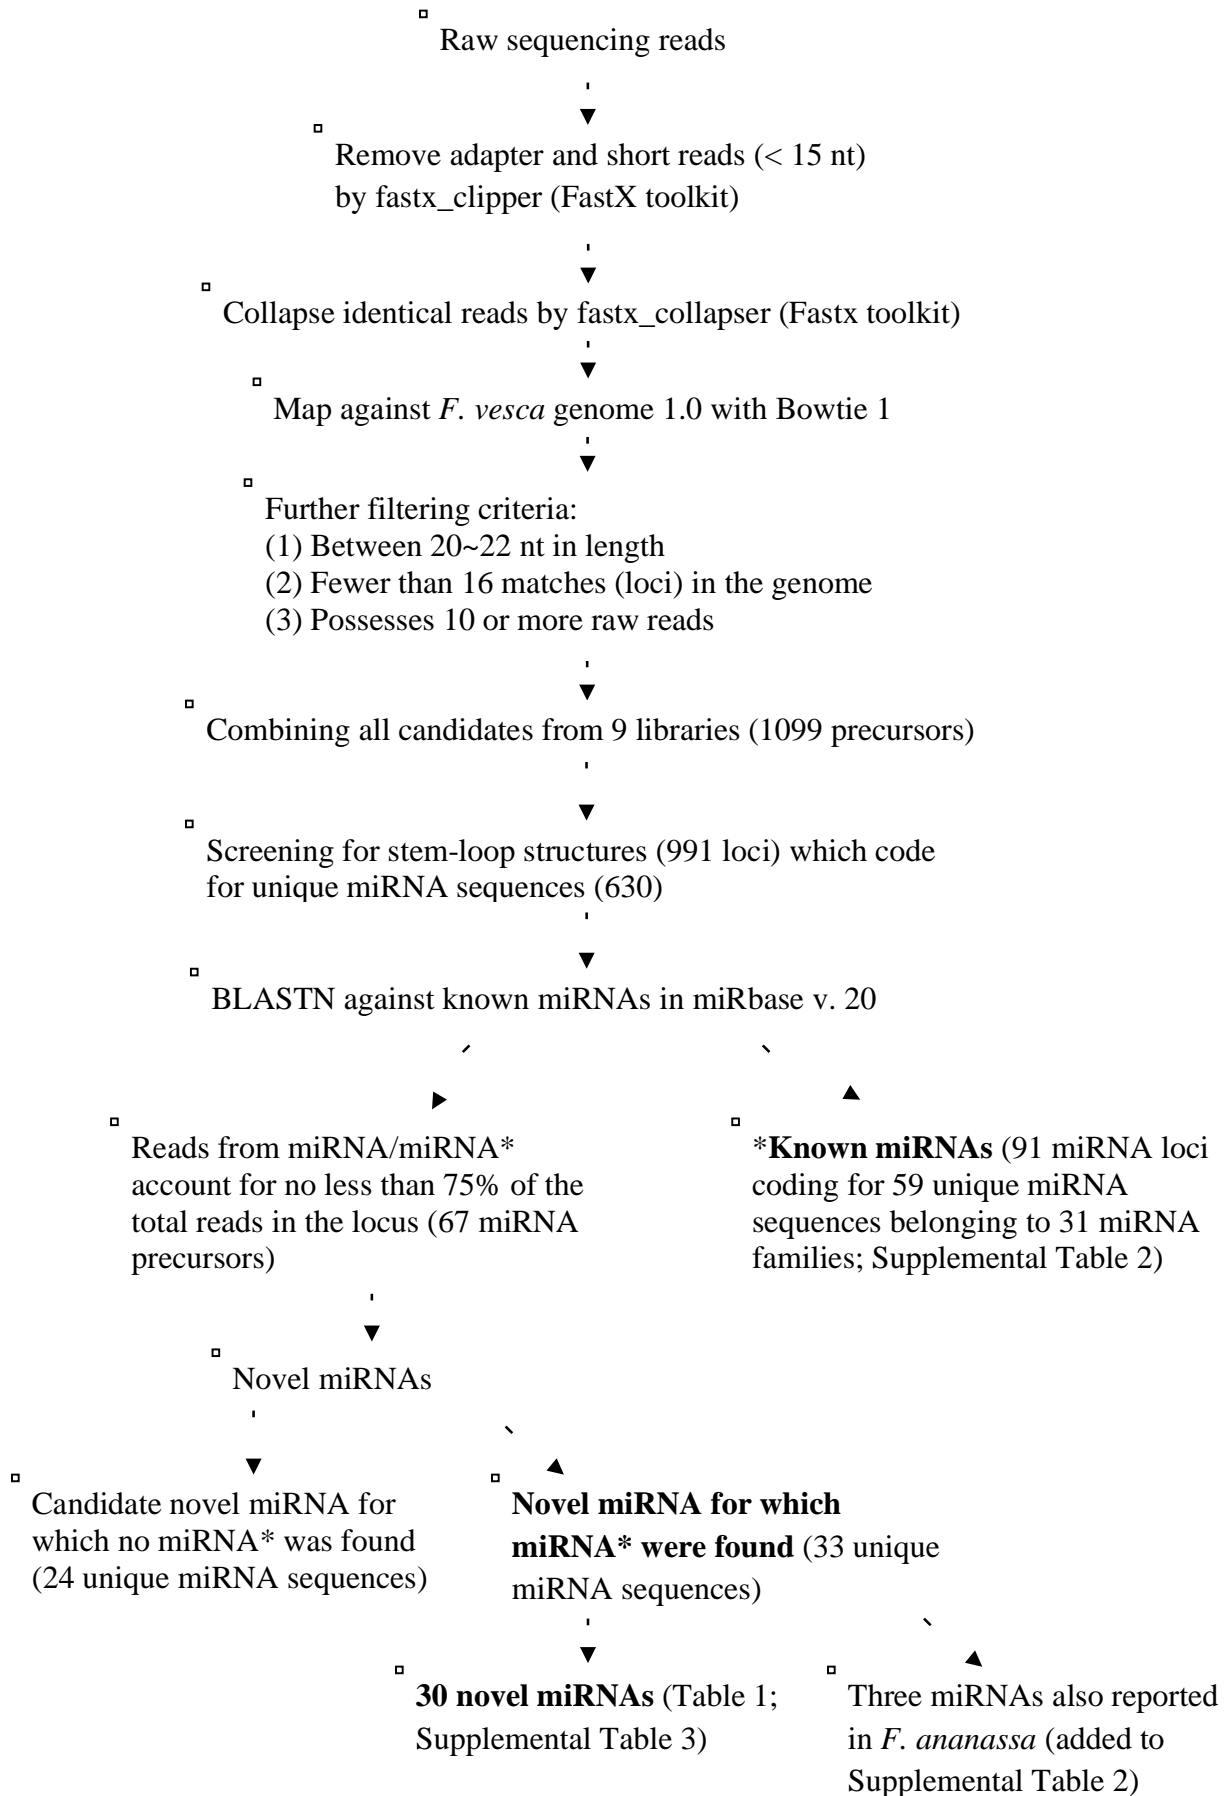

Supplemental Figure 1. Informatics pipeline for miRNA prediction.

\*Known miRNAs refer to miRNAs with  $\leq 2$  mismatches to miRNAs deposited at the miRBase v20.

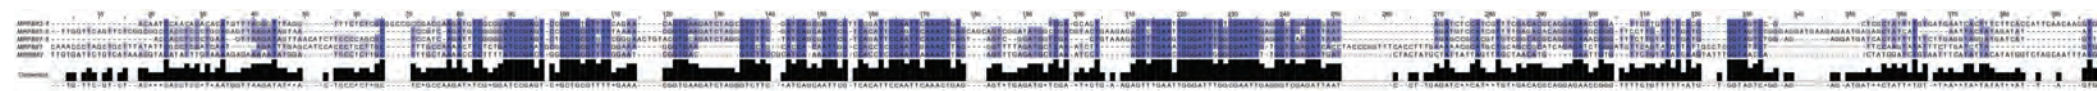

**Supplemental Figure 2. Alignment of the LG3 miRFBX precursor sequences**

Sequences were aligned by MUSCLE (<http://www.ebi.ac.uk/Tools/msa/muscle/>), and the alignment was viewed in Jalview (<http://www.jalview.org/>). Sequence conservation level is denoted by different color with dark color showing a high level of conservation. Consensus sequence is included in the bottom.

NAME: fve-MIR11286  
SEQ:UUGGAGAGAGAGAGUAGACAAUG  
LENGTH: 21

Supplemental Figure 3. Secondary structures of thirty-two novel miRNA precursors  
Red signifies miRNA and green signifies miRNA\*

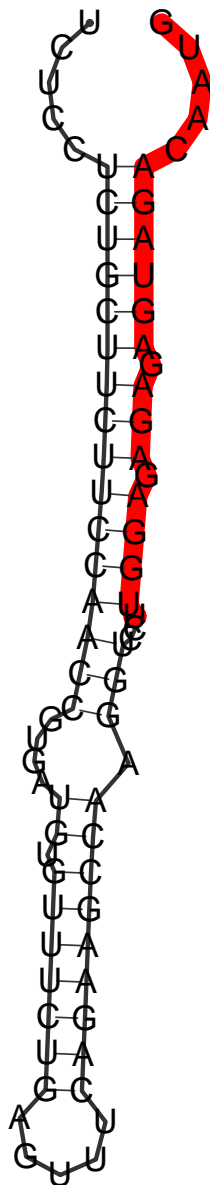

NAME: fve-MIR11287  
SEQ:UCAGGGAUUGUUUCAUAGACC  
LENGTH: 21

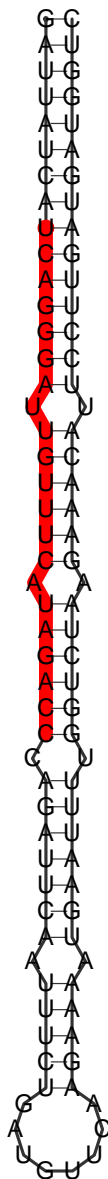

NAME: fve-MIR11288a  
SEQ:UGGGAUUUGGCGAAUUGUGGU  
LENGTH: 21

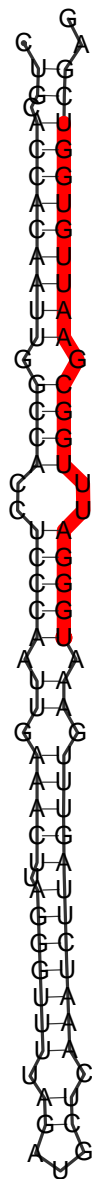

NAME: fve-MIR11288c.2\*

SEQ:UUCGUUCGGAUCCAAUUCAAA

LENGTH: 22

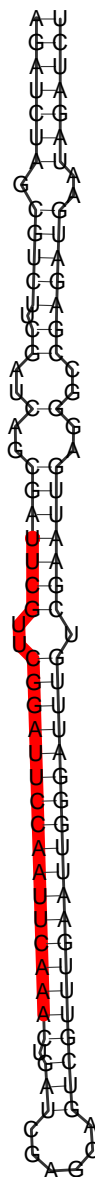

NAME: fve-MIR11289  
SEQ:UCGUCGACAUCAAAGGGCACC  
LENGTH: 21

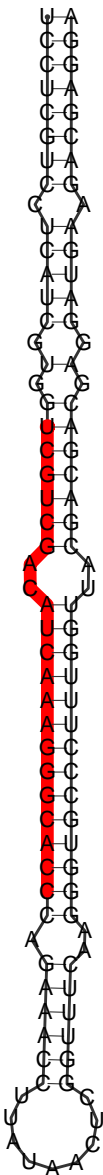

NAME: fve-MIR11290  
SEQ: UGCUUCAAGUCUGGCCAAUACU  
LENGTH: 22

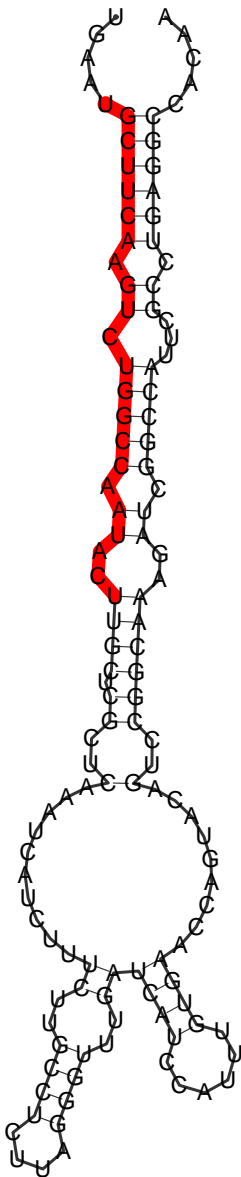



NAME: fve-MIR11291  
SEQ:UUGCGGUCUUGUCUCUCCAAU  
LENGTH: 22

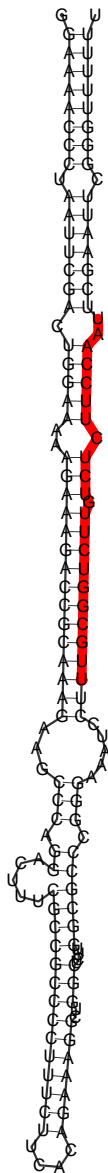

NAME: fve-MIR11292  
SEQ:UUGUAGUUCAGCGCCUCCGCC  
LENGTH: 21

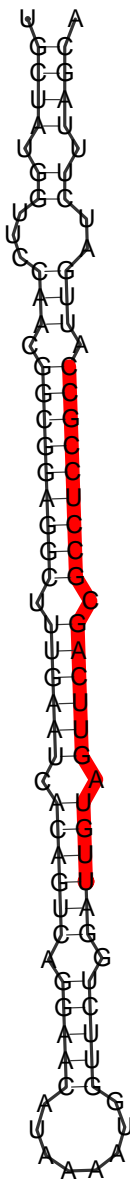

NAME: fve-MIR11293  
SEQ:UUCUUCCUCAGGAACCUCCACC  
LENGTH: 22

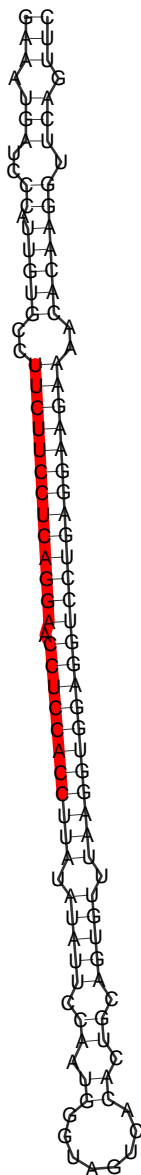

NAME: fve-MIR11294  
SEQ:UUCACCUUGGACCAUAACUGACC  
LENGTH: 22

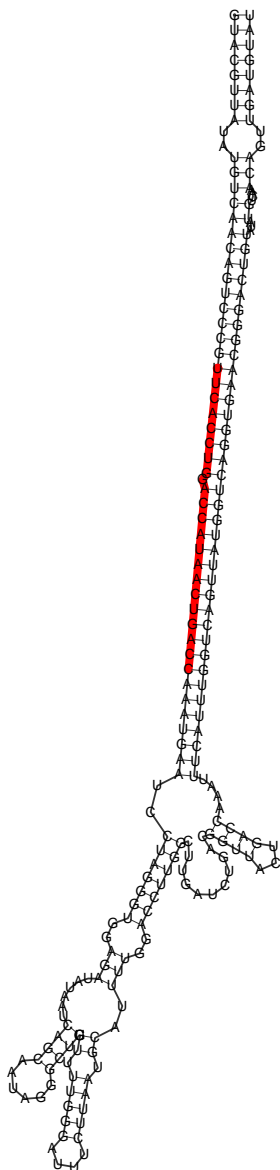

NAME: fve-MIR11295  
SEQ: CUCAUUCAAUUUCGGUAUUCAG  
LENGTH: 22

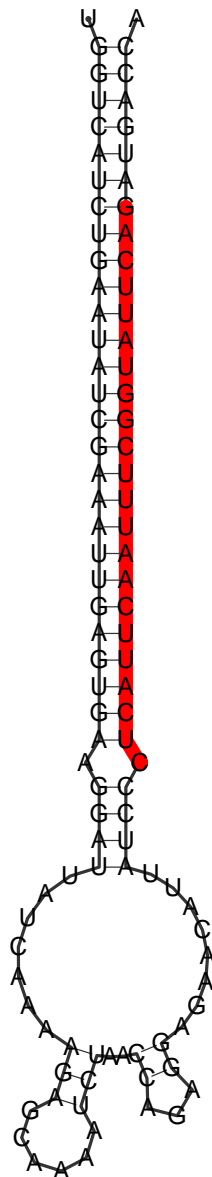

NAME: fve-MIR11296  
SEQ:UUUUUGAUGGCUGGAAUCCAGU  
LENGTH: 22

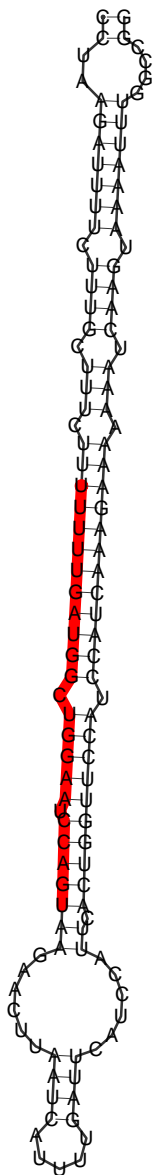

NAME: fve-MIR11297  
SEQ: CAGACAAGAUCGAUCUCGCCU  
LENGTH: 21

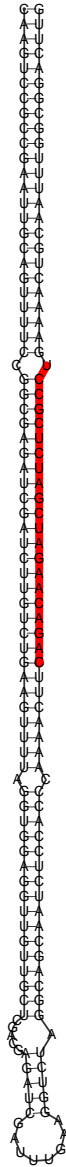

NAME: fve-MIR11298  
SEQ:UUGAGGGGCUUAACGAUUACC  
LENGTH: 21

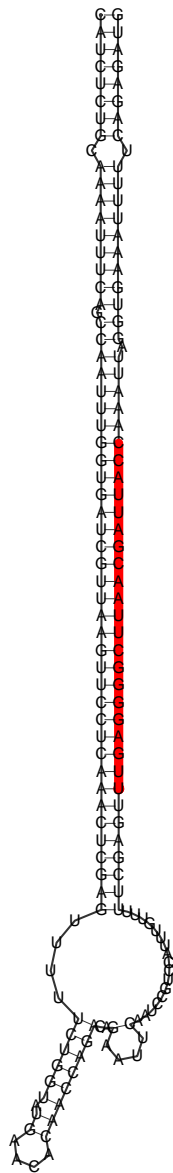



NAME: fve-MIR11299  
SEQ: CAAAUAGGGUUGGCUGAUACU  
LENGTH: 21

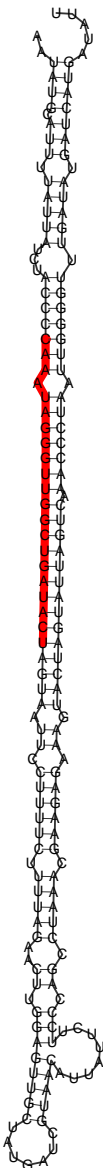

NAME: fve-MIR11300  
SEQ:CAACAUCACUGUUCUCUCCU  
LENGTH: 21

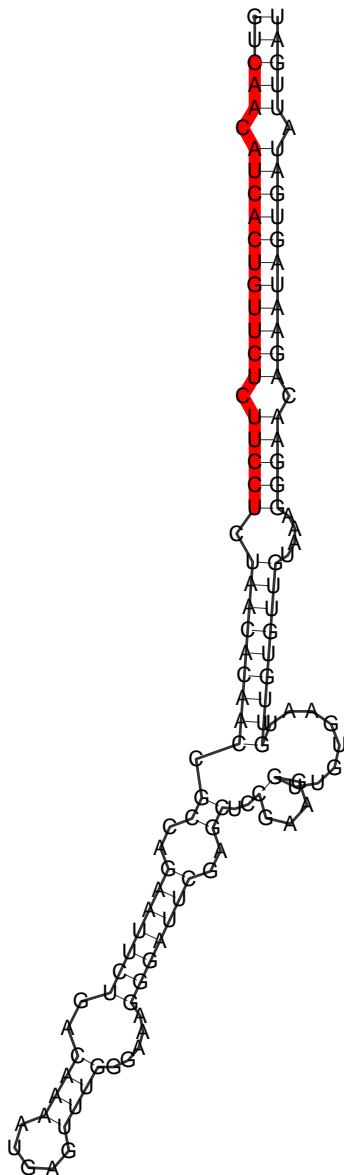

NAME: fve-MIR11301  
SEQ:UCAGAGUUGUAAUAUAUUGAU  
LENGTH: 21

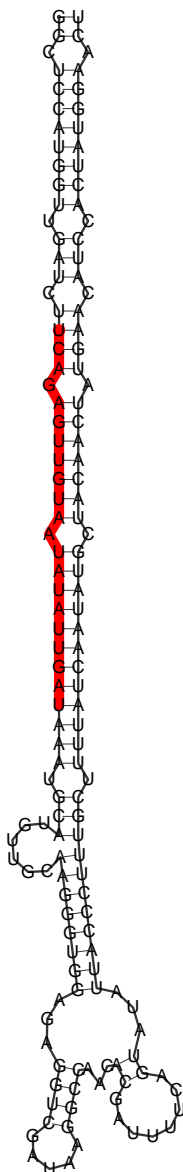

NAME: fve-MIR11302  
SEQ:AGGACCGCCAUCACGUUUUGG  
LENGTH: 21

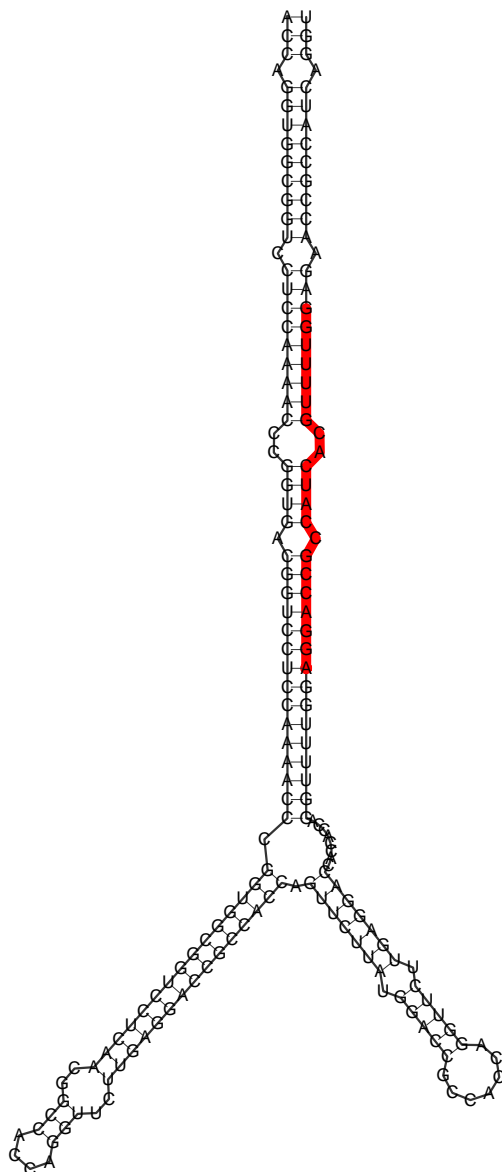

NAME: fve-MIR11303  
SEQ:UCAAACAUCACUGCAGCUGUA  
LENGTH: 21

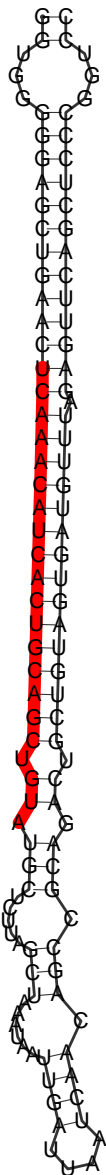

NAME: fve-MIR11304  
SEQ:UAGUGUUUCAGCUUGACAAG  
LENGTH: 20

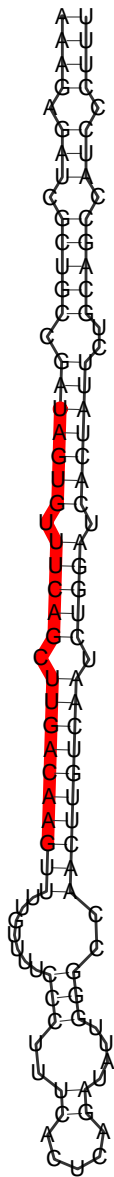

NAME: fve-MIR11305  
SEQ:UUUUGGUCCGAAUCCGAGCUCC  
LENGTH: 22

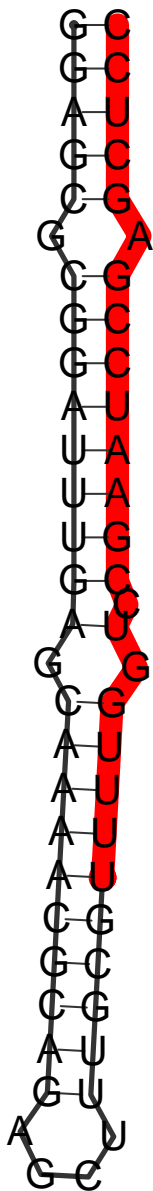

NAME: fve-MIR11306  
SEQ: CUACCGAAGAACUUUGCAAAAG  
LENGTH: 22

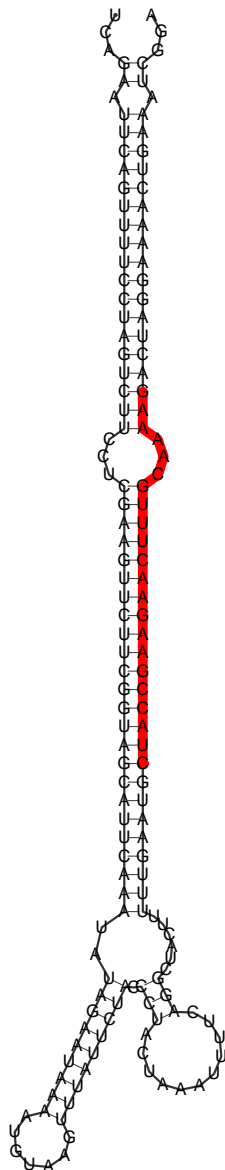



NAME: fve-MIR11307  
SEQ:UAAGCGACGGACUCCAAUCGC  
LENGTH: 21

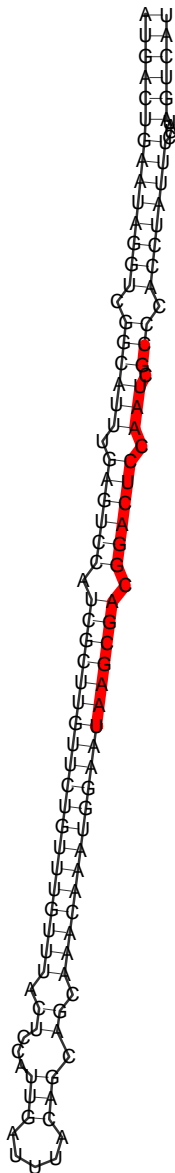

NAME: fve-MIR11308  
SEQ:UAAGUUAGGAUUCUAGUUACC  
LENGTH: 21

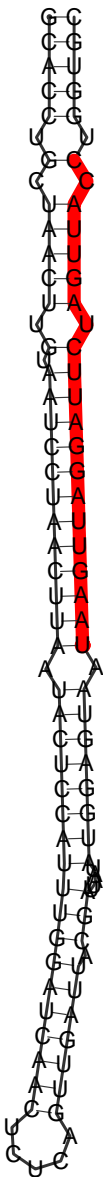

NAME: fve-MIR11309  
SEQ:UUUGUUUGGCAUGCAGUUGGC  
LENGTH: 21

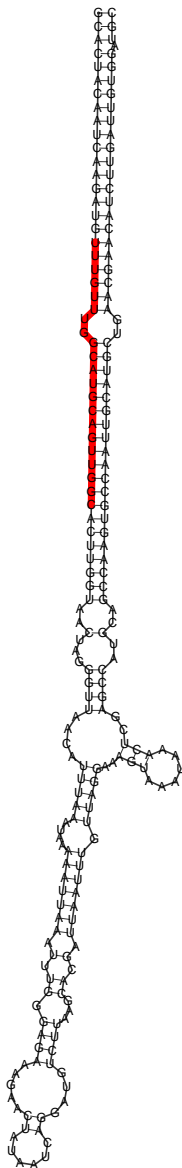

NAME: fve-MIR11310  
SEQ:AGGGAUCACAACUCCAGUGCU  
LENGTH: 21

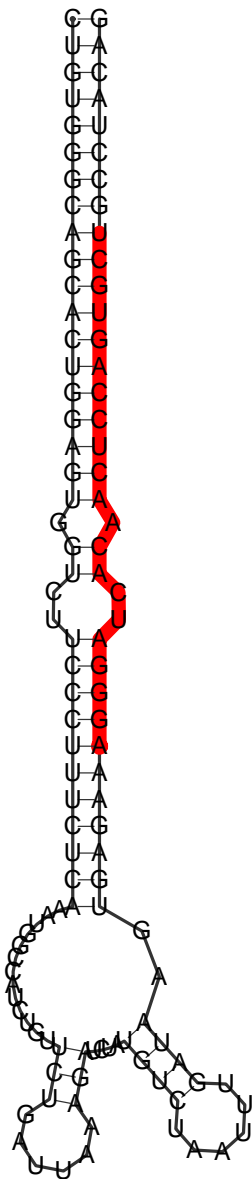



NAME: fve-MIR11312  
SEQ:UGGAGCUGUUGGGGAGAGUUA  
LENGTH: 21

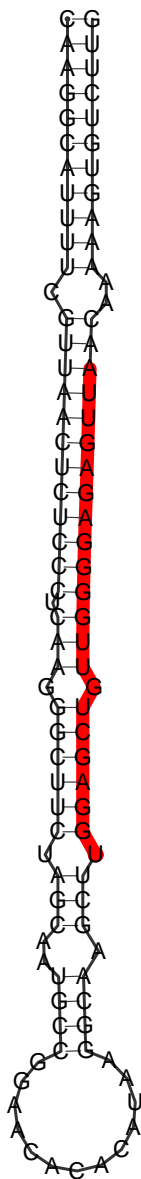

NAME: fve-MIR11313  
SEQ:GAAAAGAAUGGACUCUCCGGGG  
LENGTH: 22

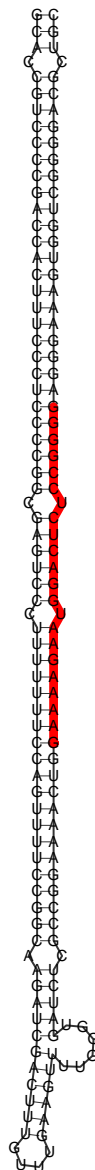

NAME: fve-MIR11314  
SEQ:AGAGUUGUGGAUGCUAUGAAU  
LENGTH: 21

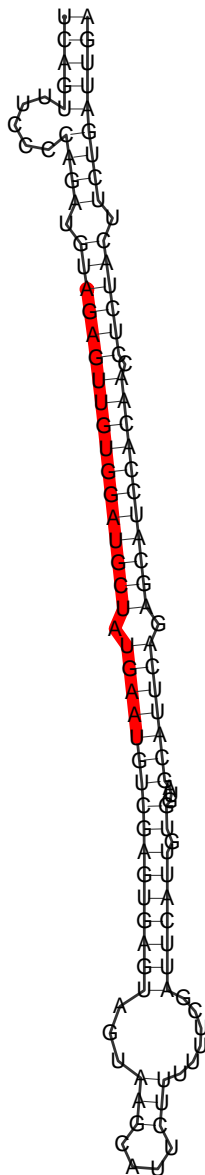



NAME: fve-MIR11315  
SEQ:CUAGUCAUUGGUCAUAGCAUC  
LENGTH: 21

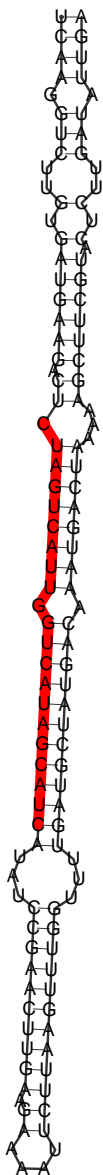

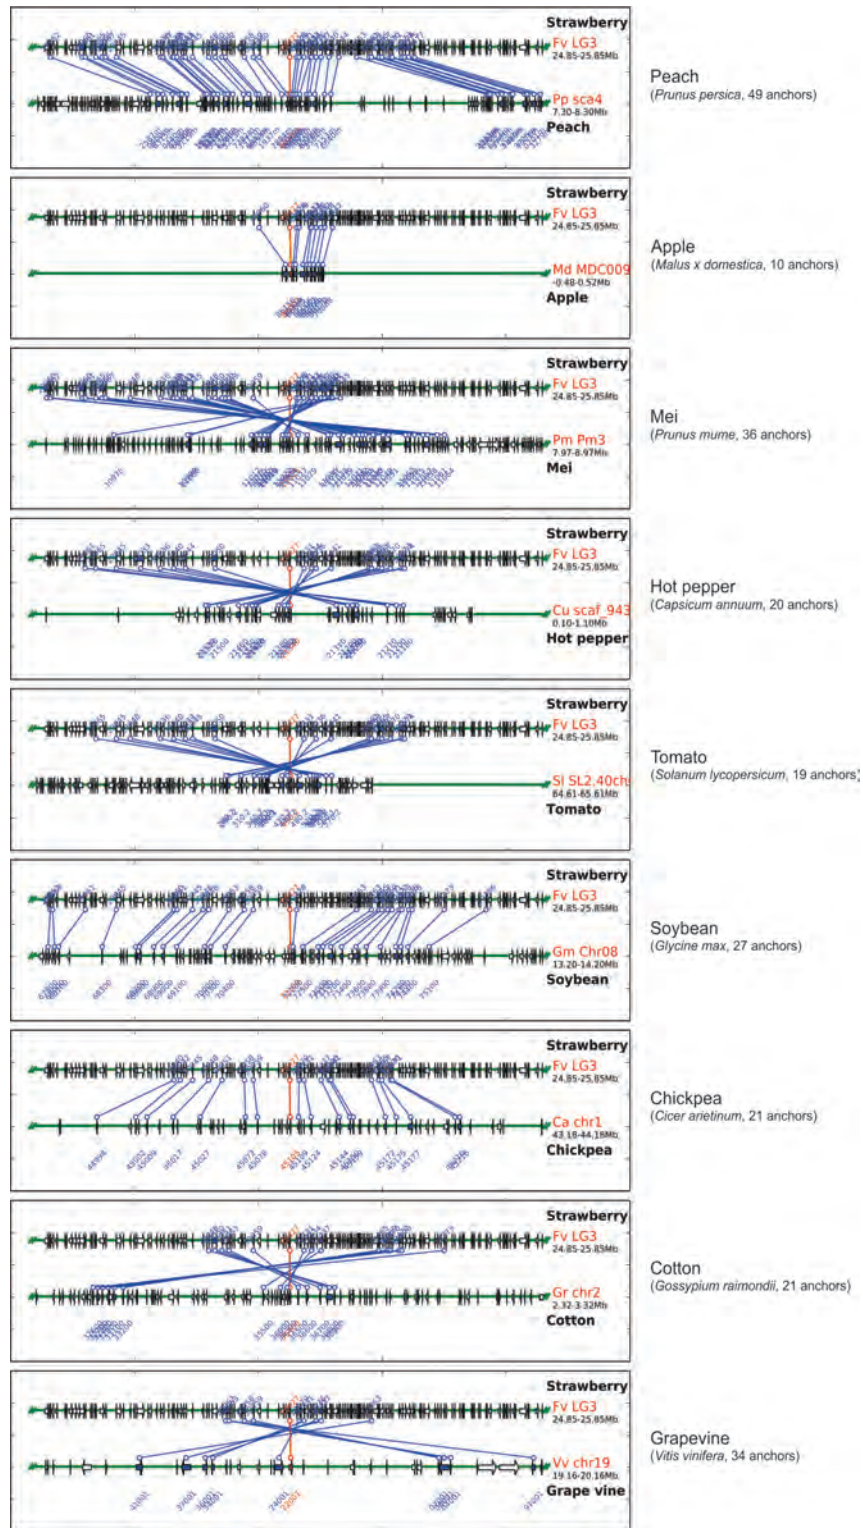

**Supplemental Figure 4. Syntenic analysis in several plant species of the region containing the LG3 miRFBX cluster.**

An alignment of syntenic regions (a window of 500 kb) was retrieved from the PGDD (<http://chibba.agtec.uga.edu/duplication/index/home>). A gene adjacent to the LG3 cluster in strawberry, mrna14027, was used as a query to search for related syntenic regions in multiple species. Genes were denoted by small arrows, with genes of syntenic matches highlighted in blue. All syntenic genes between two species are connected by blue lines, except the one highlighted with a red line, which connects the strawberry mrna14027 to its syntenic match in the other genomes.

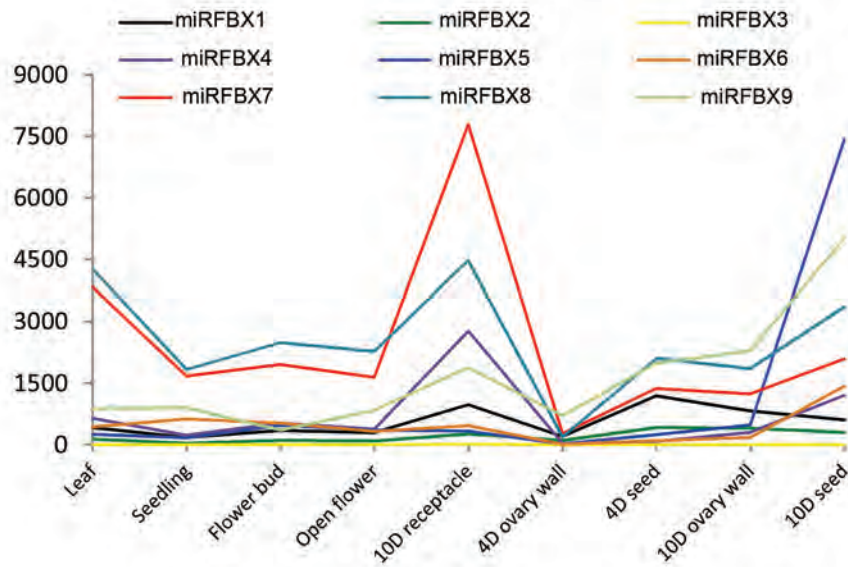

**Supplemental Figure 5. Read abundance of all nine mature miRFBXs**

Y-axis indicates read abundance in RPTM (Reads Per Ten Million). X-axis indicates nine small RNA libraries of different tissue origins.
